# Supplementary material for: Comparative Effectiveness of Intracranial Pressure Monitoring vs No Monitoring in Severe Penetrating Brain Injury Management
Source: PubMed Central journal article supplement (PMC10313150; doi:10.1001/jamanetworkopen.2023.1077), 2023-03-24
Supplement: jamanetwopen-e231077-s001.pdf [file jamanetwopen-e231077-s001.pdf]

## Supplemental Online Content

Mansour A, Rowell S, Powla PP, Horowitz P, Goldenberg FD, Lazaridis C. Comparative effectiveness of intracranial pressure monitoring vs no monitoring in severe penetrating brain injury management. *JAMA Netw Open*. 2023;6(3):e231077.  
doi:10.1001/jamanetworkopen.2023.1077

### **eTable.** ICD-10 Codes

This supplementary material has been provided by the authors to give readers additional information about their work.

| <b>eTable. ICD-10 Codes</b>                                               |                                                |
|---------------------------------------------------------------------------|------------------------------------------------|
| <b>Code</b>                                                               | <b>Description</b>                             |
| <b>S06</b>                                                                | Intracranial Injury                            |
| <b>S06.5</b>                                                              | Traumatic subdural hemorrhage                  |
| <b>S06.6</b>                                                              | Traumatic subarachnoid hemorrhage              |
| <b>S06.2</b>                                                              | Diffuse traumatic brain injury                 |
| <b>S06.3</b>                                                              | Focal traumatic brain injury                   |
| <b>S06.A</b>                                                              | Traumatic brain compression and herniation     |
| <b>S06.A0*</b>                                                            | Traumatic brain compression without herniation |
| <b>S06.A1*</b>                                                            | Traumatic brain compression with herniation    |
| <b>S06.1</b>                                                              | Traumatic brain edema                          |
| <b>S06.4</b>                                                              | Epidural hemorrhage                            |
| <b>S06.8</b>                                                              | Other specified intracranial injuries          |
| <b>S06.9</b>                                                              | Unspecified intracranial Injury                |
| *Also include ICD S06.A1XA, A1XD, A1XS as well as S06.A0XA, A0XD and A0XS |                                                |
