# Supplementary material for: Comparative Effectiveness of Intracranial Pressure Monitoring vs No Monitoring in Severe Penetrating Brain Injury Management
Source: PubMed Central journal article supplement (PMC10313150; doi:10.1001/jamanetworkopen.2023.1077), 2023-03-24
Supplement: jamanetwopen-e231077-s002.pdf [file jamanetwopen-e231077-s002.pdf]

## Data Sharing Statement

Mansour. Comparative Effectiveness of Intracranial Pressure Monitoring vs No Monitoring in Severe Penetrating Brain Injury Management. *JAMA Netw Open*. Published March 03, 2023. doi:10.1001/jamanetworkopen.2023.1077

### Data

**Data available:** Yes

**Data types:** Data dictionary

**How to access data:** Data come from the National Trauma Databank; access to the databank requires request and purchase. For our data dictionary email [lazaridis@uchicagomedicine.org](mailto:lazaridis@uchicagomedicine.org)

**When available:** With publication

### Supporting Documents

**Document types:** Statistical/analytic code

**How to access documents:** Requests addressed to [lazaridis@uchicagomedicine.org](mailto:lazaridis@uchicagomedicine.org)

**When available:** With publication

### Additional Information

**Who can access the data:** Researchers with approved requests.

**Types of analyses:** For any purpose.

**Mechanisms of data availability:** After approval of a proposal.
